## RESEARCH ARTICLE

# Job burnout, cognitive functioning, and Brain-derived neurotrophic factor expression among hospital Mexican nurses

Nadia Yanet Cortés-Álvarez<sup>1</sup>, Alfredo Lara-Morales<sup>1</sup>, Elizabeth Bautista-Rodríguez<sup>2</sup>, Leticia Gabriela Marmolejo-Murillo<sup>3</sup>, Alejandra Díaz Jiménez<sup>4</sup>, Lourdes Alejandra Vergara Hernández<sup>5</sup>, Monserrat Fernández Moya<sup>5</sup>, César Rubén Vuelvas-Olmos<sup>6\*</sup>

**1** Department of Nursing and Midwifery, Division of Natural and Exact Sciences, University of Guanajuato, Guanajuato, Mexico, **2** Faculty of Biotechnology, Laboratory of Medical & Pharmaceutical Biotechnology, Universidad Popular Autónoma del Estado de Puebla (UPAEP), Puebla, Mexico, **3** Department of Medicine and Nutrition, Division of Health Sciences, University of Guanajuato, Guanajuato, Mexico, **4** Psychology Program, University Rosario Castellanos, Mexico City, Mexico, **5** Department of Nursing and Midwifery, Division of Life Sciences, University of Guanajuato, Guanajuato, Mexico, **6** Medical Sciences Program, School of Medicine, University of Colima, Colima, Mexico

\* [czarvuelvas@gmail.com](mailto:czarvuelvas@gmail.com)

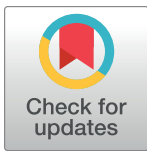

## OPEN ACCESS

**Citation:** Cortés-Álvarez NY, Lara-Morales A, Bautista-Rodríguez E, Marmolejo-Murillo LG, Díaz Jiménez A, Vergara Hernández LA, et al. (2024) Job burnout, cognitive functioning, and Brain-derived neurotrophic factor expression among hospital Mexican nurses. *PLoS ONE* 19(5): e0304092. <https://doi.org/10.1371/journal.pone.0304092>

**Editor:** Juan Jesús García-Iglesias, University of Huelva: Universidad de Huelva, SPAIN

**Received:** January 2, 2024

**Accepted:** May 6, 2024

**Published:** May 24, 2024

**Copyright:** © 2024 Cortés-Álvarez et al. This is an open access article distributed under the terms of the [Creative Commons Attribution License](https://creativecommons.org/licenses/by/4.0/), which permits unrestricted use, distribution, and reproduction in any medium, provided the original author and source are credited.

**Data Availability Statement:** Data cannot be shared publicly due to confidentiality restrictions, as they contain sensitive information about participants. However, researchers who meet the criteria for accessing confidential data may request access from the Ethics Committee via email at [salud@guanajuato.gob.mx](mailto:salud@guanajuato.gob.mx).

**Funding:** This research was supported by the Consejo Estatal de Salud Mental de la Secretaría de

## Abstract

### Aim

To analyze the relationship between burnout syndrome, cognitive functions, and sBDNF (Serum Brain-derived Neurotrophic Factor) in Mexican nurses.

### Method

A descriptive cross-sectional design was used. This study target staff nurses working in hospitals in Guanajuato, México. Demographic and working condition data were collected via questionnaire. The Maslach Burnout Inventory (MBI) was used to evaluate burnout. A blood sample were collected and processed by ELISA technique to measure sBDNF. Finally, the General Cognitive Assessment (CAB) of the Cognifit® neuropsychological battery was used to evaluated cognitive functions.

### Results

Findings showed that there are sociodemographic characteristics and working conditions associated with burnout syndrome among nurses. Furthermore, the data demonstrated a significant decrease in sBDNF levels in burnout nurses and a negative correlation between BDNF levels and burnout syndrome. Additionally, these burnout nurse also revealed significant cognitive impairment in reasoning, memory, and attention as well as total scores of CAB. Interestingly, we found a positive correlation between sBDNF levels and the cognitive deficits in burnout nurse.

Salud de Guanajuato, Guanajuato, México and the Consejo de Ciencia y Tecnología del Estado de Puebla, Puebla, México. <https://salud.guanajuato.gob.mx/>. This article received funding for publication from IDEA GTO.

**Competing interests:** The authors have declared that no competing interests exist.

## Conclusion

Reduced BDNF levels could be a biological indicator or part of the pathological process of burnout, which could affect cognitive abilities. Reduced cognitive function in nurses has relevant implications and emphasizes the need for specialized preventive strategies because nurses make clinical decisions concerning their patients, whose situations are constantly changing.

## 1. Introduction

The nursing profession has historically been stressful due to a variety of factors, including physical labor, patient suffering, death, staffing issues, disagreements with coworkers, insufficient professional training, a lack of social support, an overwhelming workload and demands at work, the growing use of technology, the unpredictability of patient care and the unsettling mismatch between expectations and the reality of nursing as a profession [1,2]. Additionally, the health crisis caused by the COVID-19 pandemic, where nurses, as the largest collective of health professionals, worked under enormous pressure, with limited protective supplies [3,4] and high work demands, which together have represented a risk for triggering or aggravating the presence of burnout syndrome.

Burnout syndrome has conceptualized as a syndrome in response to chronic (long-term and cumulative) stress at work. The main symptoms of burnout syndrome include emotional exhaustion, depersonalization, and reduced personal achievement [5]. Health personnel suffering from burnout syndrome may present negative personal consequences such as substance abuse, drug dependence, strained relationships, depression, anxiety, and even suicidal ideas [6,7]. Furthermore, affecting important professional consequences such as lower patient satisfaction, deteriorated quality of care, decreased work productivity, and an increased risk of laxity [8–11], resulting in nurses being susceptible to negligence lawsuits with substantial costs for health personnel and hospitals [12].

Alarming, one of the main symptoms of burnout syndrome is cognitive impairment [13–15], with predominant deficits related to executive functions, attention, and memory [16,17], which may predispose nurses to medical errors [18] due to practicing nursing involves complex cognitive processes such a clinical reasoning, making inferences and decision-making to determine an appropriate course of action [19]. These cognitive functions are related to the coordination and regulation of thoughts, behavior towards chosen goals, and the ability to switch between multiple tasks [20,21], as well as visuospatial construction skills [22].

Brain-derived neurotrophic factor (BDNF) is a neurotrophin family protein that is widely expressed in the hippocampus, hypothalamus, and cerebral cortex. It is involved in the survival, growth, and maintenance of several types of neurons as well as synaptic plasticity [23]. Furthermore, neurogenesis and long-term potentiation—two processes suggested to underlie biological mechanisms for hippocampal-dependent forms of learning and memory [24,25]—have been linked to decreased levels of BDNF [26–28].

Research has suggested that reduced BDNF levels may be linked to the neurobiology of burnout syndrome and are linked to cognitive deficits [29]. Research has shown that individuals with burnout syndrome tend to have low levels of sBDNF and that depersonalization and emotional weariness are negatively correlated. Yet, there is also an indication of a positive correlation with the competence subscales of the burnout inventory, suggesting that low BDNF may contribute to the neurobiology of burnout syndrome [13,29].

Given the importance of the nursing staff in all health care systems and considering that it is one of the most exposed sectors to psychosocial illnesses, the aim of the present study was to analyze the relationship between burnout syndrome, cognitive functions, and sBDNF in nursing personnel.

## 2. Methods

### Design

A descriptive cross-sectional design was used.

### Participants and settings

This study target staff nurses working in hospitals in Guanajuato, México. A convenience sampling technique was used to select study hospitals. Both sexes, at least a nursing diploma, a minimum of one year in the present unit, and signing the informed consent form were requirements for inclusion. Participants were not required to have directly cared for patients with COVID-19. Nurses who did not adequately or thoroughly fulfil the survey form were excluded. All completed the survey in February 2022.

### Data collection

A research invitation to take part in the study was put up on the hospital bulletin board once the managers of the hospitals gave their approval. An online questionnaire in Spanish was designed and applied through an online survey platform (Google Forms, Google Inc., California, USA). Each head nurse received the survey link, which they then shared with the hospital's nursing WhatsApp group. Nurses were invited to spread the word about the study to as many nurses as possible. The survey assessed three types of variables: demographic characteristics, working condition and burnout syndrome.

- **Demographic variables:** Professional license number and hospital workplace (to make sure they met the inclusion criteria and avoid duplication of respondents), age, sex, and marital status.
- **Working condition:** level education, years of experience in the profession, nurse-to-patient ratio, if consider appropriate the number of patients assigned per day, type of hiring, hours worked a week, work shift, number of current Jobs (by the time of the study), dependents, and job satisfaction.
- **Burnout syndrome:** The Maslach Burnout Inventory (MBI), of Maslach and Jackson was used, MBI is a 15-item self-report survey with a 7-point rating system (0 = never to 6 = every day), which assess the three burnout dimensions (emotional exhaustion (EA), depersonalization (DP), and reduced professional fulfillment (RP)) [30]. Each dimension's total scores are categorized into high, moderate, and low tertiles. The dimension measuring EA has three cutoff points: low <11, moderate 11–15, and high  $\geq 15$ . There are three strata for the DP subscale: low <9, moderate 9–12, and high  $\geq 12$ . Lastly, the cut-off points for the RP dimension are low <19, moderate 19–22, and high  $\geq 22$  [13]. Scores high in AE and DP and low in RP define the syndrome [31,32]. The MBI Inventory has been translated into Spanish and has shown satisfactory reliability and validity; the internal consistency coefficient of the three dimensions was 0.835, 0.607, and 0.733.

## Measurement of sBDNF levels

Following an overnight fast, participants' blood samples were taken. Serum was separated and processed by sandwich enzyme-linked immunosorbent assay (ELISA technique) using a commercial kit (Human BDNF ELISA Kit ab212166 | Abcam) according to the manufacturer's instructions.

## Cognitive evaluation

The General Cognitive Assessment (CAB) of the Cognifit® neuropsychological battery was administered the same day the blood sample was drawn (<https://www.cognifit.com/es>). All subjects performed the test at least one hour after breakfast. Cognifit® is used individually to measure the cognitive functioning of all participants. The cognitive functions evaluated were reasoning, memory, attention, coordination, and perception. Each of these cognitive functions had subtasks, which were also evaluated.

## Ethical considerations

This study was conducted in compliance with the Norma Oficial Mexicana-012-SSA3-2012 and Declaration of Helsinki. Additionally, it was approved by the Research and Bioethics Committee of the Hospital Materno Infantil de Irapuato (Registration number CIBHMII-004). All participants gave their informed consent. During the collection and analysis of the data, the principles of confidentiality and privacy were ensured while maintaining the anonymity of the participants.

## Data analysis

Sample characteristics were described using basic statistics, including means, standard deviations, frequencies, and percentages. Multivariate regression analysis with the 'enter' method to delve into how BDNF levels and Cognitive Functions performance in Cognifit influenced in Burnout (MBI Burnout). Univariate generalized linear with a main effects model (linear regression) was used to measure the associations between sociodemographic characteristics and working conditions with MBI scores. Associations were presented using beta coefficients, confidence intervals, and P-values. The significance level was set at 0.05. Analyses were performed in IBM SPSS Statistics (version 26.0).

## 3. Results

### Burnout syndrome, sociodemographic characteristics and working condition

According to the results obtained among the Maslach Burnout Inventory, participants were divided in two groups: With burnout syndrome (n = 50) and without syndrome (n = 50). [Table 1](#) shows the sociodemographic characteristics and working conditions among both groups.

### Association between sociodemographic characteristics and working condition on burnout syndrome

As shown [Table 2](#), female nurses, married individuals, those with a college education or higher, and nurses with over 11 years of experience are more likely to report higher Maslach Burnout Inventory (MBI) scores, indicating an increased risk of burnout syndrome. Other factors significantly associated with elevated MBI scores include higher nurse-to-patient ratios, temporary contracts, longer working hours (more than 48 hours per week), and certain work shift patterns (rotating or multiple shifts).

**Table 1. Sociodemographic characteristics and Working conditions.**

| Variables                                                                        | With syndrome burnout | Without syndrome burnout |
|----------------------------------------------------------------------------------|-----------------------|--------------------------|
| <b>Sex<sup>a</sup></b>                                                           |                       |                          |
| Women                                                                            | 25 (50)               | 25 (50)                  |
| Men                                                                              | 25 (50)               | 25 (50)                  |
| <b>Marital status<sup>a</sup></b>                                                |                       |                          |
| Married                                                                          | 22 (44)               | 23 (46)                  |
| Divorced                                                                         | 7 (14)                | 5 (10)                   |
| Single                                                                           | 12 (24)               | 19 (38)                  |
| Common-law marriage                                                              | 6 (12)                | 2 (4)                    |
| Widowed                                                                          | 3 (6)                 | 1 (2)                    |
| <b>Age (years)<sup>b</sup></b>                                                   | 37.92 ± 7.34          | 37.30 ± 6.16             |
| <b>Highest educational level<sup>a</sup></b>                                     |                       |                          |
| Technique                                                                        | 13 (26)               | 14 (28)                  |
| College                                                                          | 28 (56)               | 30 (60)                  |
| Especiality                                                                      | 7 (14)                | 5 (10)                   |
| Postgraduate                                                                     | 2 (4)                 | 1 (2)                    |
| <b>Experience in the profession (years)<sup>a</sup></b>                          |                       |                          |
| ≤10 years                                                                        | 15 (30)               | 13 (26)                  |
| ≥11 years                                                                        | 35 (70)               | 37 (74)                  |
| <b>Nurse-to-patient ratio<sup>a</sup></b>                                        |                       |                          |
| 1:1                                                                              | 1 (2)                 | 3 (6)                    |
| 1:2                                                                              | 1 (2)                 | 3 (6)                    |
| 1:3                                                                              | 3 (6)                 | 4 (8)                    |
| 1:4                                                                              | 3 (6)                 | 5 (10)                   |
| 1:5                                                                              | 19 (38)               | 16 (32)                  |
| 1:6 or more                                                                      | 23 (46)               | 19 (38)                  |
| <b>Considers appropriate the number of patients assigned per day<sup>a</sup></b> |                       |                          |
| Yes                                                                              | 5 (10)                | 10 (20)                  |
| No                                                                               | 45 (90)               | 40 (80)                  |
| <b>Type of hiring<sup>a</sup></b>                                                |                       |                          |
| Temporary contract                                                               | 15 (35)               | 20 (40)                  |
| Indefinite contract                                                              | 35 (70)               | 30 (60)                  |
| <b>Hours worked a week<sup>a</sup></b>                                           |                       |                          |
| Up to 24 hours                                                                   | 2 (4)                 | 6 (12)                   |
| Up to 36 hours                                                                   | 4 (8)                 | 9 (18)                   |
| Up to 40 hours                                                                   | 17 (34)               | 14 (28)                  |
| More than 48 hours                                                               | 27 (54)               | 21 (42)                  |
| <b>Work shift<sup>a</sup></b>                                                    |                       |                          |
| Morning                                                                          | 2 (4)                 | 5 (10)                   |
| Evening                                                                          | 4 (8)                 | 6 (12)                   |
| Night                                                                            | 9 (18)                | 8 (16)                   |
| More than one work shift*                                                        | 23 (46)               | 21 (42)                  |
| Rotating**                                                                       | 12 (24)               | 10 (20)                  |
| <b>Number of current jobs (by the time of the study)<sup>a</sup></b>             |                       |                          |
| 1 job only                                                                       | 8 (16)                | 11 (22)                  |
| 2 jobs                                                                           | 22 (44)               | 20 (40)                  |
| 3 jobs                                                                           | 15 (30)               | 13 (26)                  |
| More than 3 jobs                                                                 | 5 (10)                | 6 (12)                   |

(Continued)

Table 1. (Continued)

| Variables                           | With syndrome burnout | Without syndrome burnout |
|-------------------------------------|-----------------------|--------------------------|
| <b>Dependents<sup>a</sup></b>       |                       |                          |
| 0 to 3 people                       | 33 (66)               | 37 (74)                  |
| 4 to 6 people                       | 13 (26)               | 10 (20)                  |
| More than 7 people                  | 4 (8)                 | 3 (6)                    |
| <b>Job satisfaction<sup>a</sup></b> |                       |                          |
| Dissatisfied                        | 17 (34)               | 12 (24)                  |
| Little satisfied                    | 23 (46)               | 27 (54)                  |
| Satisfied                           | 6 (12)                | 5 (10)                   |
| Very Satisfied                      | 4 (8)                 | 6 (12)                   |

<sup>a</sup>Data presented as frequencies and percentages.

<sup>b</sup>Data presented as mean  $\pm$  standard deviation.

<sup>c</sup>Comparison using the  $X^2$  test.

<sup>d</sup>Comparison using the t-test.

\*Those people who work more than one work shift per day.

\*\*Those people who just have one work shift, but it is not a fixed shift.

<https://doi.org/10.1371/journal.pone.0304092.t001>

## Cognitive functions

As shown in Fig 1, when comparing both groups, a statistically significant difference was identified in total scores of CAB, reasoning, memory, and attention, revealing lower scores in the group of nurses without burnout syndrome. Similarly, Fig 2 shows lower scores in the planning, cognitive flexibility, contextual memory, working memory, nonverbal memory, visual short-term memory, divided attention, spatial perception, and auditory perception subtasks on group of nurses without burnout syndrome.

## sBDNF levels

As shown in Fig 3, a significantly lower expression was identified ( $t = 3.248$ ,  $df = 46$ ,  $p = 0.001$ ) in the nursing group with burnout syndrome ( $243.17 \pm 84.49$  pg/ml) compared to group without burnout syndrome ( $362.75 \pm 68.79$  pg/ml). Furthermore, a negative correlation was identified between BDNF levels and burnout syndrome ( $r = -.414$ ;  $p < 0.001$ ).

## Linear regression analysis of burnout syndrome and its relationship with BDNF and cognitive functions

The multiple regression analysis results indicate that BDNF levels and cognitive functions (reasoning and memory) are significantly negatively associated with the MBI score. This means that higher BDNF levels and cognitive functions are associated with lower MBI scores. The independent predictors attention, coordination, and perception were not significantly associated with the MBI score (Table 3).

## Correlation between BDNF levels and cognitive functions among burnout group

Finally, we analyzed the correlation coefficients ( $r$ ) and  $p$ -values for the correlation between BDNF levels and cognitive function. Findings shown that there is a significant positive correlation between BDNF levels on general cognitive function, as well as memory, attention, and reasoning (Table 4).

**Table 2. Associations between demographic data, depression, anxiety, sleep quality, physical activity, and cognitive function (second evaluation).**

| Variable                                                 | MBI Score |                 |               |
|----------------------------------------------------------|-----------|-----------------|---------------|
|                                                          | $\beta$   | 95% CI          | p-value       |
| <b>Sex</b>                                               |           |                 |               |
| Female                                                   | 3.852     | 0.620 to 5.084  | <b>0.008*</b> |
| Male                                                     |           | Reference       |               |
| <b>Marital status</b>                                    |           |                 |               |
| Married                                                  | 2.752     | 1.421 to 3.083  | <b>0.023*</b> |
| Divorced                                                 | 0.169     | -0.315 to 0.653 | 0.497         |
| Single                                                   | 1.203     | 1.192 to 2.514  | <b>0.001*</b> |
| Common-law marriage                                      | 1.034     | -0.421 to 1.353 | 0.931         |
| Widowed                                                  |           | Reference       |               |
| <b>Highest educational level</b>                         |           |                 |               |
| Technique                                                | 0.875     | 0.632 to 1.118  | 0.051         |
| College                                                  | 1.234     | 1.014 to 2.454  | <b>0.007*</b> |
| Especially                                               | 0.423     | 0.198 to 0.648  | 0.633         |
| Postgraduate                                             |           | Reference       |               |
| <b>Experience in the profession (years)</b>              |           |                 |               |
| $\geq 11$ years                                          | 1.315     | 1.045 to 1.586  | <b>0.002*</b> |
| $\leq 10$ years                                          |           | Reference       |               |
| <b>Nurse-to-patient ratio</b>                            |           |                 |               |
| 1:6 or more                                              | 3.215     | 1.015 to 4.415  | <b>0.004*</b> |
| 1:5                                                      | 2.452     | 1.214 to 3.690  | <b>0.011*</b> |
| 1:4                                                      | 0.768     | 0.591 to 0.946  | 0.071         |
| 1:3                                                      | 0.874     | 0.732 to 7.016  | 0.426         |
| 1:2                                                      | 0.237     | 0.364 to 0.8237 | 0.837         |
| 1:1                                                      |           | Reference       |               |
| <b>Type of hiring</b>                                    |           |                 |               |
| Temporary contract                                       | 1.327     | 1.035 to 1.619  | <b>0.008*</b> |
| Indefinite contract                                      |           | Reference       |               |
| <b>Hours worked a week</b>                               |           |                 |               |
| More than 48 hours                                       | 4.576     | 1.289 to 6.863  | <b>0.001*</b> |
| Up to 40 hours                                           | 1.423     | 1.128 to 1.718  | 0.204         |
| Up to 36 hours                                           | 0.774     | 0.374 to 0.947  | 0.375         |
| Up to 24 hours                                           |           | Reference       |               |
| <b>Work shift</b>                                        |           |                 |               |
| Rotating                                                 | 2.734     | 1.352 to 3.116  | <b>0.001*</b> |
| More than one work shift                                 | 1.412     | 1.124 to 2.701  | <b>0.006*</b> |
| Night                                                    | 1.237     | 0.975 to 1.499  | <b>0.032*</b> |
| Evening                                                  | 0.869     | 0.674 to 1.065  | 0.141         |
| Morning                                                  | 0.935     | 0.726 to 1.144  | 0.208         |
| <b>Number of current jobs (by the time of the study)</b> |           |                 |               |
| More than 3 jobs                                         | 2.876     | 1.463 to 4.290  | <b>0.001*</b> |
| 3 jobs                                                   | 1.523     | 1.210 to 2.836  | <b>0.003*</b> |
| 2 jobs                                                   | 0.847     | 0.625 to 1.070  | 0.158         |
| 1 job only                                               |           | Reference       |               |
| <b>Dependents</b>                                        |           |                 |               |
| More than 7 people                                       | 2.327     | 1.014 to 3.640  | <b>0.007*</b> |

(Continued)

Table 2. (Continued)

| Variable                | MBI Score |                |               |
|-------------------------|-----------|----------------|---------------|
|                         | $\beta$   | 95% CI         | p-value       |
| 4 to 6 people           | 1.542     | 1.208 to 2.876 | <b>0.001*</b> |
| 0 to 3 people           | 0.865     | 0.632 to 1.098 | 0.106         |
| Dependents              |           | Reference      |               |
| <b>Job satisfaction</b> |           |                |               |
| Dissatisfied            | 3.876     | 1.463 to 4.290 | <b>0.001*</b> |
| Little satisfied        | 2.523     | 1.210 to 3.836 | <b>0.003*</b> |
| Satisfied               | 0.847     | 0.625 to 1.070 | 0.327         |
| Very Satisfied          |           | Reference      |               |

$\beta$ : Beta coefficient; CI: Confidence Interval; \* $p < 0.05$

\*\* $p < 0.001$ .

<https://doi.org/10.1371/journal.pone.0304092.t002>

### 4. Discussion

The origin of research on burnout syndrome occurs in professions involving human interactions, particularly those that require attending to individuals in need of assistance and care, including nursing personnel. Based on this background, the aim of the present study was to analyze the relationship between burnout syndrome, cognitive functions, and sBDNF among nurses with and without burnout.

In the present study burnout syndrome were associated with female sex, more than 4 dependents, as well as have married and single marital status These findings are consistent with a previous literature since it was found how females suffered higher levels of burnout syndrome than males in their working environment [33,34]. Furthermore, consistent with other research [35,36], burnout was more common among female nurses than male nurses. In general, women have more combined duties at work and home than men do, which may be the source of this condition [37]. Additionally, it has been proposed that after repeated stressors, women are still more susceptible than males to lower cortisol levels, women may therefore be more sensitive than men to mood dysregulation after psychosocial stress due to the changes in

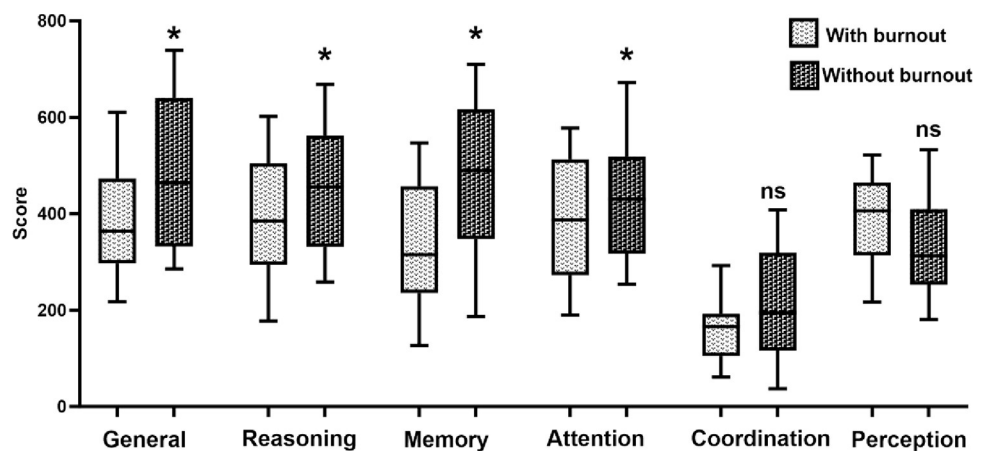

Fig 1. Comparing cognitive outcomes: Performance in task Cognifit. White box with a point = nurses with burnout. Black box with point = nurses without burnout. Unpaired t-tests were used to measure statistical significance \* $p < 0.05$ .

<https://doi.org/10.1371/journal.pone.0304092.g001>



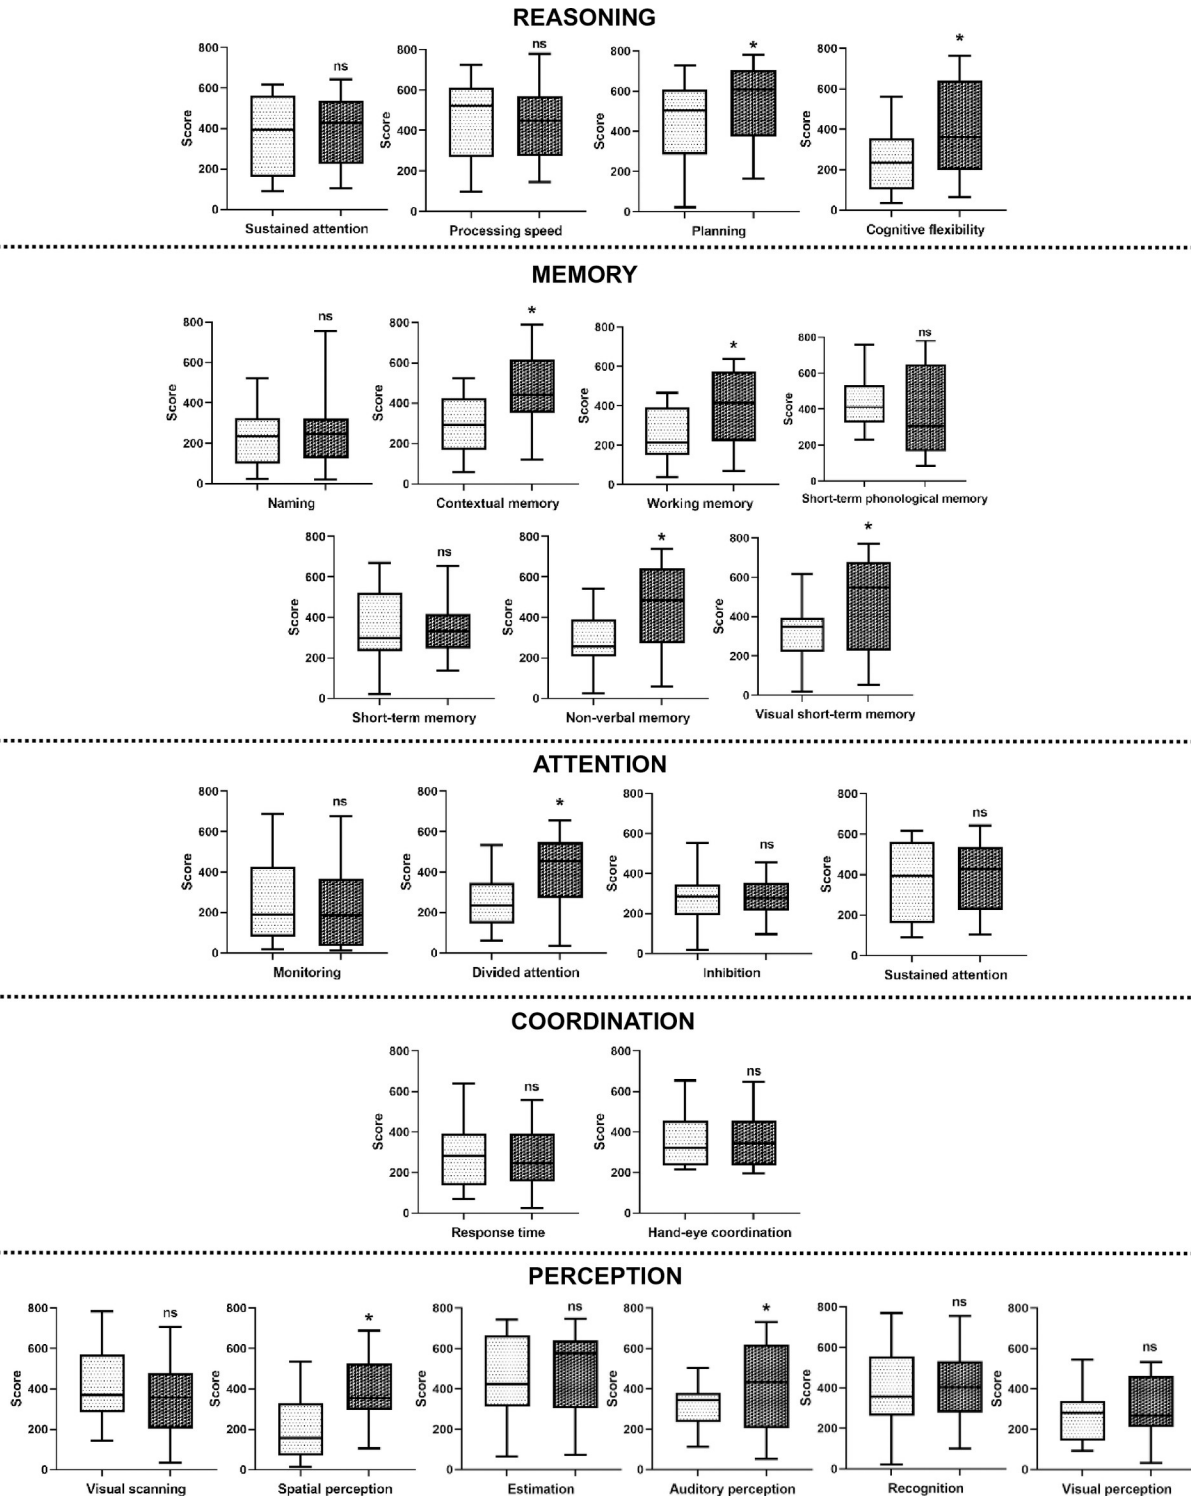

**Fig 2. Comparing sub cognitive task: Performance in Cognifit.** White box with a point = nurses with burnout. Black box with point = nurses without burnout. Unpaired t-tests were used to measure statistical significance \* $p < 0.05$ .

<https://doi.org/10.1371/journal.pone.0304092.g002>

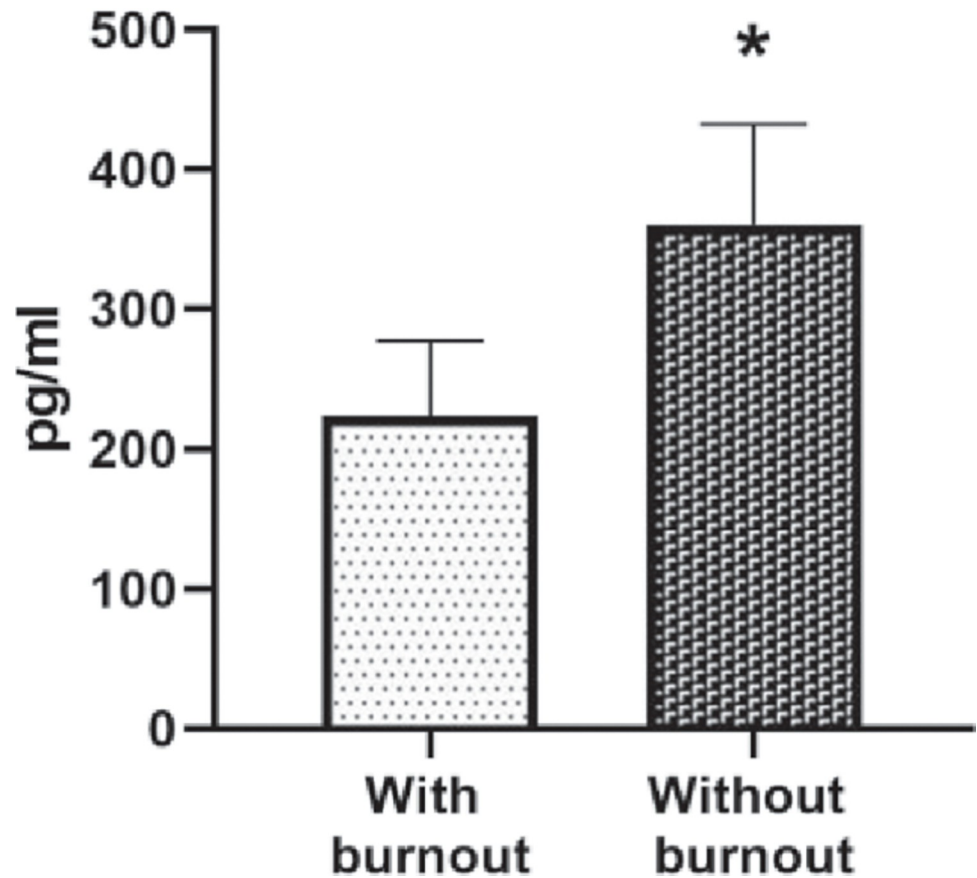

**Fig 3. sBDNF levels among both groups nurse staff.** Unpaired t-tests were used to measure statistical significance \* $p < 0.05$ .

<https://doi.org/10.1371/journal.pone.0304092.g003>

ovarian hormones on the hypothalamic-pituitary-adrenal (HPA) axis and brain circuits involved in the stress response [38].

Regarding the number of dependents, it has been suggested that a higher number of children or economic dependents has been associated with higher levels of burnout among health

**Table 3. Linear regression model with MBI score.**

|                            | MBI Score |                |               |
|----------------------------|-----------|----------------|---------------|
|                            | B         | 95% CI         | p-value       |
| <b>BDNF</b>                |           |                |               |
| pg/ml                      | 1.432     | 0.620 to 0.935 | <b>0.001*</b> |
| <b>Cognitive functions</b> |           |                |               |
| Total scores of CAB        | 0.871     | 0.364 to 0.953 | <b>0.006*</b> |
| Reasoning                  | 0.832     | 0.421 to 0.926 | <b>0.015*</b> |
| Memory                     | 0.671     | 0.238 to 0.833 | <b>0.027*</b> |
| Attention                  | 0.345     | 0.192 to 0.871 | 0.359         |
| Coordination               | 0.523     | 0.421 to 0.715 | 0.931         |
| Perception                 | 0.148     | 0.094 to 0.423 | 0.822         |

$\beta$ : Beta coefficient; 95% CI: Confidence Interval; \* $p < 0.05$ .

<https://doi.org/10.1371/journal.pone.0304092.t003>

**Table 4. Correlation between cognitive function data and BDNF protein expression among burnout group.**

| Cognitive evaluation | BDNF Levels |               |
|----------------------|-------------|---------------|
|                      | r           | p             |
| Total scores of CAB  | 0.591       | <b>0.007*</b> |
| Reasoning            | 0.564       | <b>0.003*</b> |
| Memory               | 0.541       | <b>0.005*</b> |
| Attention            | 0.615       | <b>0.001*</b> |
| Coordination         | 0.102       | 0.482         |
| Perception           | 0.121       | 0.615         |

Data analyzed using Pearson's correlation coefficient. N = 50.

<https://doi.org/10.1371/journal.pone.0304092.t004>

personnel [39,40]. Number of dependents, there has been a proposal indicating that an increased count of children or economic dependents is associated with elevated instances of burnout among healthcare personnel [41]. The observed outcomes could be elucidated by the dual-role responsibilities individuals undertake, managing both their professional commitments and domestic roles within society. Some studies show that even the presence of burnout is more intense in those professionals who have children under 12 years of age, attributable to an increased need for supervision and care at home [42]. The simultaneous assumption of several responsibilities can lead to a greater perception of individual burnout, especially when they have a greater number of children [43].

Finally, in the present study, both the married and the single marital status was associated with higher levels of burnout syndrome. These findings are replicated in other studies, for example Hameed et al. 2018 [44] suggest that married status increased the chance of burnout by 2.64 times compared to unmarried residents while Hompoth et al. 2018 [45] report that being single was a risk factor for burnout. These contradictory findings could be explained by the fact that, on the one hand marriage comes with additional responsibilities which could contribute to burnout but not having a partner can mean lack of support security, and encouragement that the couple offers to cope with work-related stressors.

On the other hand, college education,  $\geq 11$  years' experience in the profession, have 3 or more jobs, 1:5 or more nurse-to-patient ratio, temporary contract, and work more than 48 hours a week were associated with higher burnout syndrome. Additionally, work on night shift, more than one work shift and rotating work shift, and little or no job satisfaction also were associated with higher burnout syndrome.

Although it has been reported that, nursing staff see the night shift as a good component of their life because they are able to balance their schedules and organize their personal and professional lives, it is a fact, however, that working the night shift throws off employees' biological cycles, which can result in both physical and mental illnesses [46,47]. Research has shown that the circadian system is resistant to changing from a day-to-night schedule; this is demonstrated by the absence of significant phase shifts over several days in centrally controlled rhythms, such melatonin and cortisol [48].

In fact, Cannizzaro et al. 2020 [49] report night-time shift cortisol levels significantly increased before and after the work shifts. In the same line, Ibar et al., 2021 [50] found a direct relationship between hair cortisol concentration and both perceived stress and emotional exhaustion. Moreover, particularly in Mexico, despite its important and valuable work, nursing staff work under precarious conditions. According to the analysis of Aristizabal et al. 2019 [51], four of the five labor precariousness indicators among nurses in Mexico showed an increase: the percentage of people without a written contract, the percentage of people whose

income is less than twice the minimum wage, the percentage of nurses without social security, and the percentage of nurses without social benefits. Also, authors revealed that, from 46% in 2005–2006 to 54% in 2018, the proportion of nurses who work in precarious conditions.

In the same line, the monthly salary that a Mexican nurse receives is one of the lowest in the world [52], which forces them to exceed the work limit (48 hours per week) established by the Federal Labor Law [53], whether in the same job or with several jobs simultaneously. Of note, adverse job characteristics could influence the job satisfaction, and a dissatisfaction job could be associated with burnout [54,55].

As suggested in previous studies, inadequate staffing is an important factor in the experience of nurse burnout. In this line, the patient-to-nurse ratio has been linked to burnout, indicating that the higher the patient-to-nurse ratio, the higher the burnout syndrome [56,57]. Alarming, one study concluded that burnout mediated the relationship between patient-to-nurse ratios and mortality and patient safety [58,59]. In fact, it has even been suggested that burnout can be reduced by decreasing the nurse-patient ratio, which would allow nurses to have the time and energy necessary to care for patients and their families [60]. The patterns identified previous [39,54,55,61], and the present study consistently show that complex work environments are considered an important factor in burnout development, and even this factor could be decisive for staff to decide to leave their jobs.

Also, our results showed significantly lower expression BDNF in the nursing group with burnout syndrome compared to the group without burnout syndrome, furthermore, a negative correlation between BDNF levels and burnout syndrome was identified. These finding supports previous studies that have suggested that chronic stress can lead to reduced BDNF levels. For example, subjects suffering from burnout syndrome had significantly lower BDNF levels [13,62]. Similarly, according to He et al. [63], there may be a connection between sBDNF levels and job stress, causing individuals with lower sBDNF levels to experience higher degrees of job burnout.

Among the hypothesized neurobiological pathways explaining how BDNF affects burnout, it has been suggested to be due to the impact of BDNF on hippocampal synaptic plasticity. More precisely, BDNF may control high-frequency synaptic transmission, which involves MAPK and PI3K. Nevertheless, it has been discovered that impairment of the structure and function of the hippocampus is linked to mental illnesses such as anxiety and depression [63,64]. Furthermore, it was found that BDNF, which has a close relationship to the dopaminergic system's, activates the TrkB receptor, increasing dopamine release in the nucleus accumbens. It is widely acknowledged that a variety of mental diseases are significantly influenced by anomalies in the dopaminergic system [65].

At the genetic level, previous research has demonstrated that gene polymorphisms affect BDNF secretion, and individuals with distinct genotypes exhibit varying levels of BDNF [63]. He et al.'s study [66], for instance, showed that the BDNF rs2049046 altered the levels of sBDNF, indicating that the TT homozygote had a lower amount of sBDNF than the AA and AT genotypes. According to this, the authors hypothesize that a combination of BDNF rs2049046 and job stress led to a greater degree of job burnout in AT genotype patients compared to AA homozygote subjects [66]. Together, these findings lead us to hypothesize that reduced sBDNF could be a biological sign or potentially a pathological mechanism of burnout. However, more research is needed to ascertain the relationship between sBDNF levels and burnout.

Furthermore, when comparing the burnout group to its counterparts, our results revealed cognitive changes on total scores of CAB, reasoning, memory, and attention, without change in perception and coordination. The results of our current study, which showed worse cognitive performance in the burnout group, are consistent with most of the earlier research

assessing cognitive function in the burnout [67–71]. For example, finding of Chutko et al. [68] indicate cognitive complaints in burnout syndrome patients, while research by Rudman et al. [69], showed that high levels of burnout symptoms were significantly linked to more frequent symptoms of cognitive dysfunction in nurses, both early in their careers and later in life. Similarly, Pihlaja et al. [70] reported that subjects with burnout had more challenges in executive functions, than those without it and finally, according to Gavelin et al. [71] clinical burnout may be linked to decreased functioning in executive function, working memory, episodic memory, attention, and processing speed. While most of the reviewed research demonstrates cognitive deficits, it is important to emphasize that there is disagreement amongst them about the specific cognitive areas that are vulnerable to the potential effects of burnout and the degree of cognitive impairments.

A plausible rationale is related to the pathogenic mechanisms involved in burnout. There is a notion that stress relates to cognitive deficits in burnout [72]. The brain is susceptible to stress, and aside from the hypothalamus, the hippocampal area was the first to be identified as a target of glucocorticoids (e.g., cortisol) [73].

Long-term stress adaptation is regulated by the HPA axis, which requires effective termination of the stress response through a negative feedback mechanism including the action of cortisol on limbic circuits such as the hippocampus, amygdala, and prefrontal cortex, and burnout impacts these neuronal networks, this lowers the efficiency of this process and, as a result, increases basal cortisol output [74]. These neural networks can be harmed by prolonged cortisol hypersecretion, sculpting dendrites and synapses [75]. Cognitive processing requires the integrity of areas such as the hippocampus, amygdala, and prefrontal cortex [73], and stress can affect its functioning by regulating cortisol levels [76]. Therefore, cognitive deficiencies in burnout may be caused by stress-induced damage to brain regions.

Likewise, as previously described, numerous studies have demonstrated that chronic stress can lead to reduced BDNF [13,62,63] and it is well known that BDNF is a neurotrophin considered as a biomarker of cognitive function [77–79] due to being essential for controlling synaptic plasticity and promoting dopaminergic neuron survival [80], also it is considered an important regulator of synaptic transmission and LTP in the hippocampus and in other brain regions and are involved in hippocampal neurogenesis [81].

Although other research has shown a positive correlation between sBDNF levels and cognitive function in both healthy people and certain disorders that impair cognition, [82,83], as far as we know, not many studies are currently available that have analyzed the relationship between BDNF and cognition on burnout subjects. On the literature search, only found the article of He et al. [13] who reported a positive correlation between sBDNF and the cognitive total score, immediate memory, and attention in burnout participants. The relationship between BDNF and cognition on burnout subjects is supported by the present study, which identified a positive correlation between sBDNF and total scores of CAB, reasoning, memory as well as attention. Taken together, the current research supports the theory put forth by He et al. [13], which contends that chronic stress mediated by HPA axis dysfunction in burnout may be linked to lowered BDNF levels. This, in turn, may lead to inadequate brain plasticity by lowering hippocampal neurogenesis through lowered BDNF levels, potentially resulting in cognitive impairments.

In conclusion, our research demonstrated that certain sociodemographic characteristics and workplace circumstances are linked to burnout syndrome in nurses. It is necessary that these factors be considered for implementation of important clinical and policy strategies which support the daily work of nurses. In addition, findings showed a significantly decreased of sBDNF levels in burnout nurse as well as negative correlation between BDNF levels and burnout syndrome. Taken together, data point to BDNF's potential role as a biological marker

or possibly in the pathological mechanisms of burnout. Additionally, these burnout nurse also revealed significant cognitive impairment in reasoning, memory, and attention as well as total scores of CAB. Interestingly, we found a positive correlation between sBDNF levels and the cognitive deficits in burnout nurse, showing that BDNF was positively with reasoning, memory, and attention and CAB total score. These results suggest an interaction between burnout, sBDNF and cognition deficits. However, more research is needed in this regard. The impact on nursing personnel's cognitive functions has relevant implications and emphasizes the need to implement specific prevention strategies. It is important to consider that nurses make clinical decisions regarding their patients, whose circumstances can alter at any time, and therefore need to constantly rearrange the priorities and tasks of care to accommodate patients' fluctuating status.

The study has several limitations that should be taken into consideration: 1) Due the sample size among the present study, these results are important to verify in larger samples. 2) This is a cross-sectional design, which hinders establishing a direct causal relationship between BDNF and cognition in burnout nurse. Further long-term research on causal effects is required to clarify the precise nature of the connection between burnout and cognitive function. 3) BDNF levels were measured in serum and despite there are data support the view that BDNF can cross the blood-brain barrier and therefore, the measures of blood and plasma BDNF levels may reflect brain-tissue BDNF levels, the source of peripheral BDNF and its relationships to BDNF in the brain is still unclear. For instance, whole-blood BDNF levels and hippocampus BDNF levels in rats, as well as plasma BDNF and hippocampal BDNF in pigs, were shown to positively correlate, according to Klein et al. [84]. 4) Variables that might impact burnout and cognitive function, like physical exercise, mental health issues, and smoking, were not included in the current study; therefore, these variables should be addressed in future research 5) As previously recognized, exposure to stress hormones (e.g. cortisol) has an impact on BDNF levels and brain structures involved in cognition. However, the study overlooks the evaluation of stress hormones' impact on BDNF levels and cognition.

## Author Contributions

**Conceptualization:** Nadia Yanet Cortés-Álvarez.

**Data curation:** César Rubén Vuelvas-Olmos.

**Formal analysis:** Nadia Yanet Cortés-Álvarez, César Rubén Vuelvas-Olmos.

**Investigation:** Nadia Yanet Cortés-Álvarez, Alfredo Lara-Morales, Elizabeth Bautista-Rodríguez, Leticia Gabriela Marmolejo-Murillo, Alejandra Díaz Jiménez, Lourdes Alejandra Vergara Hernández, Monserrat Fernández Moya.

**Methodology:** Nadia Yanet Cortés-Álvarez, Alfredo Lara-Morales, Elizabeth Bautista-Rodríguez, Leticia Gabriela Marmolejo-Murillo, Alejandra Díaz Jiménez, Lourdes Alejandra Vergara Hernández, Monserrat Fernández Moya, César Rubén Vuelvas-Olmos.

**Project administration:** Nadia Yanet Cortés-Álvarez, César Rubén Vuelvas-Olmos.

**Software:** César Rubén Vuelvas-Olmos.

**Supervision:** Nadia Yanet Cortés-Álvarez.

**Writing – original draft:** Nadia Yanet Cortés-Álvarez, Alfredo Lara-Morales, César Rubén Vuelvas-Olmos.

**Writing – review & editing:** Nadia Yanet Cortés-Álvarez, Alfredo Lara-Morales, Elizabeth Bautista-Rodríguez, Leticia Gabriela Marmolejo-Murillo, Alejandra Díaz Jiménez, Lourdes Alejandra Vergara Hernández, Monserrat Fernández Moya, César Rubén Vuelas-Olmos.

## References

1. Quattrin R, Zanini A, Nascig E, Annunziata MA, Calligaris L, Brusaferrero S. Level of burnout among nurses working in oncology in an Italian Region. *Oncol Nurs Forum*. 2006; 33(4):815–20. <https://doi.org/10.1188/06.ONF.815-820> PMID: 16858463
2. Renzi C, Tabolli S, Ianni A, Di Pietro C, Puddu P. Burnout and job satisfaction comparing healthcare staff of a dermatological hospital and a general hospital. *Journal of the European Academy of Dermatology and Venereology*. 2005 Mar; 19(2):153–7. <https://doi.org/10.1111/j.1468-3083.2005.01029.x> PMID: 15752281
3. Catton H. Global challenges in health and health care for nurses and midwives everywhere. *Int Nurs Rev*. 2020 Mar 1; 67(1):4–6. <https://doi.org/10.1111/inr.12578> PMID: 32083728
4. Graeme D S, Ng F, Ho Cheung Li W. COVID-19: Emerging compassion, courage and resilience in the face of misinformation and adversity. *J Clin Nurs*. 2020 May 1; 29(9–10):1425–8. <https://doi.org/10.1111/jocn.15231> PMID: 32155302
5. Martínez-Pérez A. El síndrome de burnout: evolución conceptual y estado de la. *Revista de Comunicación Vivat Academia*. 2010; 1(112):42–80.
6. Dyrbye LN, Thomas MR, Massie FS, Power D V., Eacker A, Harper W, et al. Burnout and suicidal ideation among U.S. medical students. *Ann Intern Med*. 2008 Sep 2; 149(5):334–41. <https://doi.org/10.7326/0003-4819-149-5-200809020-00008> PMID: 18765703
7. Chin WS, Chen YC, Ho JJ, Cheng NY, Wu HC, Shiao JSC. Psychological Work Environment and Suicidal Ideation Among Nurses in Taiwan. *Journal of Nursing Scholarship*. 2019 Jan 1; 51(1):106–13. <https://doi.org/10.1111/jnu.12441> PMID: 30466180
8. DiMatteo MR, Sherbourne CD, Hays RD, Ordway L, Kravitz RL, McGlynn EA, et al. Physicians' Characteristics Influence Patients' Adherence to Medical Treatment: Results From the Medical Outcomes Study. *Health Psychology*. 1993; 12(2):93–102. <https://doi.org/10.1037/0278-6133.12.2.93> PMID: 8500445
9. De Hert S. Burnout in healthcare workers: Prevalence, impact and preventative strategies. Vol. 13, *Local and Regional Anesthesia*. Dove Medical Press Ltd; 2020. p. 171–83.
10. Melville A. Job satisfaction in general practice: Implications for prescribing. *Soc Sci Med Med Psychol Med Sociol*. 1980 Dec; 14(6):495–9. [https://doi.org/10.1016/0160-7979\(80\)90050-8](https://doi.org/10.1016/0160-7979(80)90050-8) PMID: 7209622
11. Grisales-Romero H, Muñoz Y, Osorio diana, Robles E. Síndrome de Burnout en el personal de enfermería de un hospital de referencia Ibagué, Colombia. *Enfermería Global*. 2016; 15(1):244–57.
12. Jones JW, Barge BN, Steffy BD, Fay LM, Kunz LK, Wuebker LJ. Stress and Medical Malpractice: Organizational Risk Assessment and Intervention. *Journal of Applied Psychology*. 1988; 73(4):727–35. <https://doi.org/10.1037/0021-9010.73.4.727> PMID: 3209582
13. He SC, Zhang YY, Zhan JY, Wang C, Du XD, Yin GZ, et al. Burnout and cognitive impairment: Associated with serum BDNF in a Chinese Han population. *Psychoneuroendocrinology* [Internet]. 2017 Mar 1 [cited 2021 Feb 24]; 77:236–43. Available from: <https://pubmed.ncbi.nlm.nih.gov/28119229/>. <https://doi.org/10.1016/j.psyneuen.2017.01.002> PMID: 28119229
14. Oosterholt BG, Maes JHR, Van der Linden D, Verbraak MJPM, Kompier MAJ. Getting better, but not well: A 1.5 year follow-up of cognitive performance and cortisol levels in clinical and non-Clinical burnout. *Biol Psychol*. 2016 May 1; 117:89–99. <https://doi.org/10.1016/j.biopsycho.2016.02.009> PMID: 26930250
15. Jonsdottir IH, Nordlund A, Ellbin S, Ljung T, Glise K, Währborg P, et al. Cognitive impairment in patients with stress-related exhaustion. *Stress*. 2013 Mar; 16(2):181–90. <https://doi.org/10.3109/10253890.2012.708950> PMID: 22746338
16. Deligkaris P, Panagopoulou E, Montgomery AJ, Masoura E. Job burnout and cognitive functioning: A systematic review. Vol. 28, *Work and Stress*. Taylor and Francis Ltd.; 2014. p. 107–23.
17. Van Der Linden D, Keijsers GPJ, Eling P, Van Schaijk R. Work stress and attentional difficulties: An initial study on burnout and cognitive failures. *Work Stress*. 2005 Jan; 19(1):23–36.
18. Potter P, Wolf L, Boxerman S, Grayson D, Sledge J, Dunagan C, et al. An Analysis of Nurses' Cognitive Work: A New Perspective for Understanding Medical Errors. *Advances in Patient Safety: From Research to Implementation (Volume 1: Research Findings)*. Agency for Healthcare Research and Quality (US); 2005.

19. Higuchi KAS, Donald JG. Thinking processes used by nurses in clinical decision making. *J Nurs Educ*. 2002 Apr; 41(4):145–53. <https://doi.org/10.3928/0148-4834-20020401-04> PMID: 11954966
20. Miller EK, Wallis JD. Executive Function and Higher-Order Cognition: Definition and Neural Substrates. In: *Encyclopedia of Neuroscience*. Elsevier Ltd; 2009. p. 99–104.
21. Miyake A, Friedman NP. The nature and organization of individual differences in executive functions: Four general conclusions. *Curr Dir Psychol Sci*. 2012 Feb; 21(1):8–14. <https://doi.org/10.1177/0963721411429458> PMID: 22773897
22. Österberg K, Skogsliden S, Karlson B. Neuropsychological sequelae of work-stress-related exhaustion. *Stress*. 2014 Jan; 17(1):59–69. <https://doi.org/10.3109/10253890.2013.862615> PMID: 24188506
23. Huang EJ, Reichardt LF. Neurotrophins: Roles in Neuronal Development and Function. *Annu Rev Neurosci*. 2001 Mar; 24(1):677–736. <https://doi.org/10.1146/annurev.neuro.24.1.677> PMID: 11520916
24. Whitlock JR, Heynen AJ, Shuler MG, Bear MF. Learning Induces Long-Term Potentiation in the Hippocampus. *Science* (1979). 2006 Aug 25; 313(5790):1093–7. <https://doi.org/10.1126/science.1128134> PMID: 16931756
25. Winocur G, Wojtowicz JM, Sekeres M, Snyder JS, Wang S. Inhibition of neurogenesis interferes with hippocampus-dependent memory function. *Hippocampus*. 2006; 16(3):296–304. <https://doi.org/10.1002/hipo.20163> PMID: 16411241
26. Lee J, Duan W, Mattson MP. Evidence that brain-derived neurotrophic factor is required for basal neurogenesis and mediates, in part, the enhancement of neurogenesis by dietary restriction in the hippocampus of adult mice. *J Neurochem*. 2002 Sep; 82(6):1367–75. <https://doi.org/10.1046/j.1471-4159.2002.01085.x> PMID: 12354284
27. Monteggia LM, Barrot M, Powell CM, Berton O, Galanis V, Gemelli T, et al. Essential role of brain-derived neurotrophic factor in adult hippocampal function. *Proceedings of the National Academy of Sciences*. 2004 Jul 20; 101(29):10827–32. <https://doi.org/10.1073/pnas.0402141101> PMID: 15249684
28. Rossi C, Angelucci A, Costantin L, Braschi C, Mazzantini M, Babbini F, et al. Brain-derived neurotrophic factor (BDNF) is required for the enhancement of hippocampal neurogenesis following environmental enrichment. *European Journal of Neuroscience*. 2006 Oct; 24(7):1850–6. <https://doi.org/10.1111/j.1460-9568.2006.05059.x> PMID: 17040481
29. Onen Sertoz O, Tolga Binbay I, Koylu E, Noyan A, Yildirim E, Elbi Mete H. The role of BDNF and HPA axis in the neurobiology of burnout syndrome. *Prog Neuropsychopharmacol Biol Psychiatry*. 2008 Aug 1; 32(6):1459–65. <https://doi.org/10.1016/j.pnpbp.2008.05.001> PMID: 18541357
30. Jackson S, Maslach C. Burnout in health professions: A social psychological analysis. In: Sanders G, Suls J, editors. *Social psychology of health and illness*. Hillsdale, New Jersey: Erlbaum; 1982. p. 227–51.
31. Elmore LC, Jeffe DB, Jin L, Awad MM, Turnbull IR. National Survey of Burnout among US General Surgery Residents. In: *Journal of the American College of Surgeons*. Elsevier Inc.; 2016. p. 440–51.
32. Aranda-Beltrán C, Moreno-Pando M. Confiabilidad y validación de la escala Maslach Burnout Inventory (Hss) en trabajadores del occidente de México. *Salud Uninorte*. 2016;218–27.
33. Redondo-Flórez L, Tornero-Aguilera JF, Ramos-Campo DJ, Clemente-Suárez VJ. Gender Differences in Stress- and Burnout-Related Factors of University Professors. *Biomed Res Int* [Internet]. 2020 [cited 2023 Nov 21]; 2020. Available from: <https://pubmed.ncbi.nlm.nih.gov/33426061/>. <https://doi.org/10.1155/2020/6687358> PMID: 33426061
34. Artz B, Kaya I, Kaya O. Gender role perspectives and job burnout. *Rev Econ Househ* [Internet]. 2022 Jun 1 [cited 2023 Nov 21]; 20(2):447. Available from: [/pmc/articles/PMC8375289/](https://pmc/articles/PMC8375289/). <https://doi.org/10.1007/s11150-021-09579-2> PMID: 34429716
35. De Hert S. Burnout in healthcare workers: Prevalence, impact and preventative strategies. Vol. 13, *Local and Regional Anesthesia*. Dove Medical Press Ltd; 2020. p. 171–83.
36. Petrino R, Riesgo LGC, Yilmaz B. Burnout in emergency medicine professionals after 2 years of the COVID-19 pandemic: a threat to the healthcare system? *European Journal of Emergency Medicine*. 2022 Aug 1; 29(4):279–84.
37. Rusca Putra K, Setyowati. Prevalence of burnout syndrome among nurses in general hospitals in provincial East Java: Cross-sectional study. *Enferm Clin* [Internet]. 2019 Sep 1 [cited 2023 Nov 21]; 29:362–6. Available from: <https://www.elsevier.es/es-revista-enfermeria-clinica-35-articulo-prevalence-burnout-syndrome-among-nurses-S1130862119301457>.
38. Albert KM, Newhouse PA. Estrogen, Stress, and Depression: Cognitive and Biological Interactions. *Annu Rev Clin Psychol* [Internet]. 2019 May 5 [cited 2023 Dec 2]; 15:399. Available from: [/pmc/articles/PMC9673602/](https://pmc/articles/PMC9673602/). <https://doi.org/10.1146/annurev-clinpsy-050718-095557> PMID: 30786242
39. Shah MK, Gandrakota N, Cimiotti JP, Ghose N, Moore M, Ali MK. Prevalence of and Factors Associated With Nurse Burnout in the US. *JAMA Netw Open* [Internet]. 2021 Feb 1 [cited 2023 Nov 22]; 4(2):



- e2036469–e2036469. Available from: <https://jamanetwork.com/journals/jamanetworkopen/fullarticle/2775923>. <https://doi.org/10.1001/jamanetworkopen.2020.36469> PMID: 33538823
40. Wang J, Hu B, Peng Z, Song H, Cai S, Rao X, et al. Prevalence of burnout among intensivists in mainland China: a nationwide cross-sectional survey. *Crit Care* [Internet]. 2021 Dec 1 [cited 2023 Nov 22]; 25(1). Available from: <https://pubmed.ncbi.nlm.nih.gov/33402210/>. <https://doi.org/10.1186/s13054-020-03439-8> PMID: 33402210
  41. Bazmi E, Alipour A, Yasamy MT, Kheradmand A, Salehpour S, Khodakarim S, et al. Job burnout and related factors among health sector employees. *Iran J Psychiatry*. 2019; 14(4):309–16. PMID: 32071605
  42. Duarte I, Teixeira A, Castro L, Marina S, Ribeiro C, Jácome C, et al. Burnout among Portuguese health-care workers during the COVID-19 pandemic. *BMC Public Health*. 2020; 20(1):1–10.
  43. Wang J, Hu B, Peng Z, Song H, Cai S, Rao X, et al. Prevalence of burnout among intensivists in mainland China: a nationwide cross-sectional survey. *Crit Care*. 2021 Dec; 25(1):1–10.
  44. Hameed TK, Masuadi E, Al Asmary NA, Al-Anzi FG, Al Dubayee MS. A study of resident duty hours and burnout in a sample of Saudi residents. *BMC Med Educ* [Internet]. 2018 Aug 2 [cited 2023 Nov 21]; 18(1). Available from: <https://pubmed.ncbi.nlm.nih.gov/30071835/>.
  45. Hompoth EA, Tőreki A, Pető Z. [Investigation of the burnout syndrome among the employees of the Department of Emergency Medicine at the University of Szeged]. *Orv Hetil* [Internet]. 2018 Jan 1 [cited 2023 Nov 21]; 159(3):113–8. Available from: <https://pubmed.ncbi.nlm.nih.gov/29332412/>.
  46. Geiger-Brown J, Rogers VE, Trinkoff AM, Kane RL, Bausell RB, Scharf SM. Sleep, sleepiness, fatigue, and performance of 12-hour-shift nurses. *Chronobiol Int* [Internet]. 2012 Mar [cited 2023 Nov 24]; 29(2):211–9. Available from: <https://pubmed.ncbi.nlm.nih.gov/22324559/>. <https://doi.org/10.3109/07420528.2011.645752> PMID: 22324559
  47. Dall’Ora C, Griffiths P, Ball J, Simon M, Aiken LH. Association of 12 h shifts and nurses’ job satisfaction, burnout and intention to leave: findings from a cross-sectional study of 12 European countries. *BMJ Open* [Internet]. 2015 [cited 2023 Nov 24]; 5(9). Available from: <https://pubmed.ncbi.nlm.nih.gov/26359284/>. <https://doi.org/10.1136/bmjopen-2015-008331> PMID: 26359284
  48. Boivin DB, Boudreau P, Kosmadopoulos A. Disturbance of the Circadian System in Shift Work and Its Health Impact. *J Biol Rhythms* [Internet]. 2022 Feb 1 [cited 2023 Nov 24]; 37(1):3–28. Available from: <https://pubmed.ncbi.nlm.nih.gov/34969316/>. <https://doi.org/10.1177/07487304211064218> PMID: 34969316
  49. Cannizzaro E, Cirrincione L, Mazzucco W, Scorciapino A, Catalano C, Ramaci T, et al. Night-Time Shift Work and Related Stress Responses: A Study on Security Guards. *Int J Environ Res Public Health* [Internet]. 2020 Jan 2 [cited 2023 Nov 24]; 17(2). Available from: <https://pubmed.ncbi.nlm.nih.gov/31952337/>.
  50. Ibar C, Fortuna F, Gonzalez D, Jamarco J, Jacobsen D, Pugliese L, et al. Evaluation of stress, burnout and hair cortisol levels in health workers at a University Hospital during COVID-19 pandemic. *Psychoneuroendocrinology* [Internet]. 2021 Jun 1 [cited 2023 Nov 24]; 128:105213. Available from: <https://pubmed.ncbi.nlm.nih.gov/33845387/>. <https://doi.org/10.1016/j.psyneuen.2021.105213> PMID: 33845387
  51. Aristizabal P, Nigenda G, Serván-Mori E. The precarization of the Mexican nursing labor market: a repeated cross-sectional analysis for the period 2005–2018. *Hum Resour Health* [Internet]. 2019 Nov 21 [cited 2023 Nov 24]; 17(1). Available from: <https://pubmed.ncbi.nlm.nih.gov/31753033/>.
  52. Organisation for Economic Cooperation and Development. Health at a Glance 2023 [Internet]. OECD; 2023 [cited 2023 Dec 2]. (Health at a Glance). Available from: [https://www.oecd-ilibrary.org/social-issues-migration-health/health-at-a-glance-2023\\_7a7afb35-en](https://www.oecd-ilibrary.org/social-issues-migration-health/health-at-a-glance-2023_7a7afb35-en).
  53. Cámara de Diputados del H. Congreso de la Unión. Ley Federal del Trabajo. Ciudad de México; 2022 Dec.
  54. Heidari S, Parizad N, Goli R, Mam-Qaderi M, Hassanpour A. Job satisfaction and its relationship with burnout among nurses working in COVID-19 wards: A descriptive correlational study. *Ann Med Surg (Lond)* [Internet]. 2022 Oct 1 [cited 2023 Nov 24]; 82. Available from: <https://pubmed.ncbi.nlm.nih.gov/36117530/>. <https://doi.org/10.1016/j.amsu.2022.104591> PMID: 36117530
  55. Shin S, Park JH, Bae SH. Nurse staffing and nurse outcomes: A systematic review and meta-analysis. *Nurs Outlook* [Internet]. 2018 May 1 [cited 2023 Nov 24]; 6(3):273–82. Available from: <https://pubmed.ncbi.nlm.nih.gov/29685321/>. <https://doi.org/10.1016/j.outlook.2017.12.002> PMID: 29685321
  56. Hanrahan NP, Aiken LH, McClaine L, Hanlon AL. Relationship between psychiatric nurse work environments and nurse burnout in acute care general hospitals. *Issues Ment Health Nurs* [Internet]. 2010 [cited 2023 Nov 24]; 31(3):198–207. Available from: <https://pubmed.ncbi.nlm.nih.gov/20144031/>. <https://doi.org/10.3109/01612840903200068> PMID: 20144031

57. Akman O, Ozturk C, Bektas M, Ayar D, Armstrong MA. Job satisfaction and burnout among paediatric nurses. *J Nurs Manag* [Internet]. 2016 Oct 1 [cited 2023 Nov 24]; 24(7):923–33. Available from: <https://onlinelibrary.wiley.com/doi/full/10.1111/jonm.12399>. PMID: 27271021
58. Liu X, Zheng J, Liu K, Baggs JG, Liu J, Wu Y, et al. Hospital nursing organizational factors, nursing care left undone, and nurse burnout as predictors of patient safety: A structural equation modeling analysis. *Int J Nurs Stud* [Internet]. 2018 Oct 1 [cited 2023 Nov 24]; 86:82–9. Available from: <https://pubmed.ncbi.nlm.nih.gov/29966828/>. <https://doi.org/10.1016/j.ijnurstu.2018.05.005> PMID: 29966828
59. Neuraz A, Guérin C, Payet C, Polazzi S, Aubrun F, Dailier F, et al. Patient Mortality Is Associated With Staff Resources and Workload in the ICU: A Multicenter Observational Study. *Crit Care Med* [Internet]. 2015 [cited 2023 Nov 24]; 43(8):1587–94. Available from: <https://pubmed.ncbi.nlm.nih.gov/25867907/>. <https://doi.org/10.1097/CCM.0000000000001015> PMID: 25867907
60. Vuong L. Staffing Ratios and Burnout. *Am J Nurs*. 2020 May 1; 120(5):13. <https://doi.org/10.1097/01.NAJ.0000662724.83879.81> PMID: 32332343
61. Dall’Ora C, Ball J, Reinius M, Griffiths P. Burnout in nursing: a theoretical review. *Human Resources for Health* 2020 18:1 [Internet]. 2020 Jun 5 [cited 2023 Nov 24]; 18(1):1–17. Available from: <https://human-resources-health.biomedcentral.com/articles/10.1186/s12960-020-00469-9>.
62. Sjörsa Dhlman A, Blennow K, Zetterberg H, Glise K, Jonsdottir IH. Growth factors and neurotrophins in patients with stress-related exhaustion disorder. *Psychoneuroendocrinology*. 2019; 109.
63. He SC, Wu S, Wang C, Wang DM, Wang J, Xu H, et al. Interaction between job stress, serum BDNF level and the BDNF rs2049046 polymorphism in job burnout. *J Affect Disord* [Internet]. 2020 Apr 1 [cited 2023 Nov 25]; 266:671–7. Available from: <https://pubmed.ncbi.nlm.nih.gov/32056943/>. <https://doi.org/10.1016/j.jad.2020.01.181> PMID: 32056943
64. Phillips LJ, McGorry PD, Garner B, Thompson KN, Pantelis C, Wood SJ, et al. Stress, the hippocampus and the hypothalamic-pituitary-adrenal axis: implications for the development of psychotic disorders. *Aust N Z J Psychiatry* [Internet]. 2006 Sep [cited 2023 Nov 25]; 40(9):725–41. Available from: <https://pubmed.ncbi.nlm.nih.gov/16911747/>. <https://doi.org/10.1080/j.1440-1614.2006.01877.x> PMID: 16911747
65. Berton O, McClung CA, DiLeone RJ, Krishnan V, Renthal W, Russo SJ, et al. Essential role of BDNF in the mesolimbic dopamine pathway in social defeat stress. *Science* [Internet]. 2006 Feb 10 [cited 2023 Nov 25]; 311(5762):864–8. Available from: <https://pubmed.ncbi.nlm.nih.gov/16469931/>. <https://doi.org/10.1126/science.1120972> PMID: 16469931
66. Jia H, He M, Zhang X, Li Y, He S chang, Zhang XY. The relationship between job stress and job burnout moderated by BDNF rs6265 polymorphism. *Psychopharmacology (Berl)* [Internet]. 2021 Oct 1 [cited 2023 Nov 25]; 238(10):2963–71. Available from: <https://pubmed.ncbi.nlm.nih.gov/34245319/>.
67. He SC, Zhang YY, Zhan JY, Wang C, Du XD, Yin GZ, et al. Burnout and cognitive impairment: Associated with serum BDNF in a Chinese Han population. *Psychoneuroendocrinology* [Internet]. 2017 Mar 1 [cited 2023 Nov 24]; 77:236–43. Available from: <https://pubmed.ncbi.nlm.nih.gov/28119229/>. <https://doi.org/10.1016/j.psyneuen.2017.01.002> PMID: 28119229
68. Chutko LS, Yakovenko EA, Surushkina SY, Rem A V., Anisimova TI, Ponomarev VA, et al. [Cognitive disorders in burnout syndrome]. *Zh Nevrol Psikhiatr Im S S Korsakova* [Internet]. 2023 [cited 2023 Nov 24]; 123(5):139–44. Available from: <https://pubmed.ncbi.nlm.nih.gov/37315253/>.
69. Rudman A, Arborelius L, Dahlgren A, Finnes A, Gustavsson P. Consequences of early career nurse burnout: A prospective long-term follow-up on cognitive functions, depressive symptoms, and insomnia. *EClinicalMedicine* [Internet]. 2020 Oct 1 [cited 2023 Nov 24]; 27. Available from: <https://pubmed.ncbi.nlm.nih.gov/33150328/>. <https://doi.org/10.1016/j.eclinm.2020.100565> PMID: 33150328
70. Pihlaja M, Tuominen PPA, Peräkylä J, Hartikainen KM. Occupational Burnout Is Linked with Inefficient Executive Functioning, Elevated Average Heart Rate, and Decreased Physical Activity in Daily Life—Initial Evidence from Teaching Professionals. *Brain Sci* [Internet]. 2022 Dec 1 [cited 2023 Nov 24]; 12(12). Available from: <https://pubmed.ncbi.nlm.nih.gov/36552182/>. <https://doi.org/10.3390/brainsci12121723> PMID: 36552182
71. Gavelin HM, Domellöf ME, Åström E, Nelson A, Launder NH, Neely AS, et al. Cognitive function in clinical burnout: A systematic review and meta-analysis. *Work Stress* [Internet]. 2022 Jan 2 [cited 2023 Nov 24]; 36(1):86–104. Available from: <https://www.tandfonline.com/doi/abs/10.1080/02678373.2021.2002972>.
72. Oosterholt BG, Maes JHR, Van der Linden D, Verbraak MJPM, Kompier MAJ. Getting better, but not well: A 1.5 year follow-up of cognitive performance and cortisol levels in clinical and non-Clinical burnout. *Biol Psychol*. 2016 May 1; 117:89–99. <https://doi.org/10.1016/j.biopsycho.2016.02.009> PMID: 26930250

73. McEwen BS. Physiology and neurobiology of stress and adaptation: Central role of the brain. *Physiol Rev* [Internet]. 2007 Jul [cited 2023 Nov 25]; 87(3):873–904. Available from: <https://doi.org/10.1152/physrev.00041.2006> PMID: 17615391
74. Chow YK, Masiak J, Mikołajewska E, Mikołajewski D, Wójcik GM, Wallace B, et al. Limbic brain structures and burnout-A systematic review. *Adv Med Sci* [Internet]. 2018 Mar 1 [cited 2023 Nov 25]; 63(1):192–8. Available from: <https://pubmed.ncbi.nlm.nih.gov/29175078/>. <https://doi.org/10.1016/j.advms.2017.11.004> PMID: 29175078
75. McEwen BS, Nasca C, Gray JD. Stress Effects on Neuronal Structure: Hippocampus, Amygdala, and Prefrontal Cortex. *Neuropsychopharmacology* [Internet]. 2016 Jan 1 [cited 2023 Nov 25]; 41(1):3–23. Available from: <https://pubmed.ncbi.nlm.nih.gov/26076834/>. <https://doi.org/10.1038/npp.2015.171> PMID: 26076834
76. Vogel S, Fernández G, Joëls M, Schwabe L. Cognitive Adaptation under Stress: A Case for the Mineralocorticoid Receptor. *Trends Cogn Sci*. 2016 Mar 1; 20(3):192–203. <https://doi.org/10.1016/j.tics.2015.12.003> PMID: 26803208
77. Pisani A, Paciello F, Del Vecchio V, Malesci R, De Corso E, Cantone E, et al. The Role of BDNF as a Biomarker in Cognitive and Sensory Neurodegeneration. Vol. 13, *Journal of Personalized Medicine*. MDPI; 2023.
78. Fioranelli M, Rocchia MG, Przybyłek B, Garo ML. The Role of Brain-Derived Neurotrophic Factor (BDNF) in Depression and Cardiovascular Disease: A Systematic Review. *Life*. 2023 Sep 26; 13(10):1967. <https://doi.org/10.3390/life13101967> PMID: 37895349
79. De Felice G, Luciano M, Boiano A, Colangelo G, Catapano P, Della Rocca B, et al. Can Brain-Derived Neurotrophic Factor Be Considered a Biomarker for Bipolar Disorder? An Analysis of the Current Evidence. Vol. 13, *Brain Sciences*. Multidisciplinary Digital Publishing Institute (MDPI); 2023.
80. He YY, Zhang XY, Yung WH, Zhu JN, Wang JJ. Role of BDNF in central motor structures and motor diseases. *Mol Neurobiol* [Internet]. 2013 [cited 2023 Nov 25]; 48(3):783–93. Available from: <https://pubmed.ncbi.nlm.nih.gov/23649659/>. <https://doi.org/10.1007/s12035-013-8466-y> PMID: 23649659
81. Leal G, Comprido D, Duarte CB. BDNF-induced local protein synthesis and synaptic plasticity. *Neuropharmacology*. 2014 Jan 1; 76(PART C):639–56. <https://doi.org/10.1016/j.neuropharm.2013.04.005> PMID: 23602987
82. Costa A, Peppe A, Carlesimo GA, Zabberoni S, Scalici F, Caltagirone C, et al. Brain-derived neurotrophic factor serum levels correlate with cognitive performance in parkinson's disease patients with mild cognitive impairment. *Front Behav Neurosci*. 2015 Sep 15; 9(September). <https://doi.org/10.3389/fnbeh.2015.00253> PMID: 26441580
83. Nikolac Perkovic M, Borovecki F, Filipcic I, Vuic B, Milos T, Nedic Erjavec G, et al. Relationship between Brain-Derived Neurotrophic Factor and Cognitive Decline in Patients with Mild Cognitive Impairment and Dementia. *Biomolecules*. 2023 Mar 1; 13(3). <https://doi.org/10.3390/biom13030570> PMID: 36979505
84. Klein AB, Williamson R, Santini MA, Clemmensen C, Etrup A, Rios M, et al. Blood BDNF concentrations reflect brain-tissue BDNF levels across species. *International Journal of Neuropsychopharmacology* [Internet]. 2011 Apr 1 [cited 2023 Nov 25]; 14(3):347–53. Available from: <https://doi.org/10.1017/S1461145710000738> PMID: 20604989
